# Supplementary material for: Ataxin-3 Plays a Role in Mouse Myogenic Differentiation through Regulation of Integrin Subunit Levels
Source: PubMed Central journal article supplement (PMC2909204; doi:10.1371/journal.pone.0011728), 2010-07-23
Supplement: pone.0011728.s001.pdf [file pone.0011728.s001.pdf]

## MATERIALS AND METHODS S1

### Constructs and mutagenesis

The cDNA fragments encoding the full-length mouse ATX3 protein (mATX3, 1-355aa), the josphin domain (jos, 1-215aa) and the C-terminal (UIMs, 215-355aa) were amplified by PCR, from the pMjd1 plasmid using, respectively, the primer pairs including the 5' and 3' attB site-specific recombination sequences (Gateway Cloning System): attB1Mjd/attB2Mjd, attB1Mjd/attB2Mjd:Jos, and attB1Mjd:UIMs/attB2Mjd (Supplemental Table 2). To obtain the pDONR207Mjd:C14A and pDONR207Mjd:jos:C14A plasmids a point mutation was introduced, corresponding to the alteration of the cysteine for an alanine residue at position 14, into the pDONR207Mjd and the pDONR207Mjd:jos plasmids using the mutagenesis primer Mjd-mutC14A (Supplemental Table 2), the Pfu Turbo enzyme (Stratagene) and the DpnI endonuclease enzyme according to the published conditions (Makarova O et al., 2000). The recombinant His-tag protein expression plasmids (pDEST17Mjd, pDEST17Mjd:jos, pDEST17Mjd:UIMs, pDEST17Mjd:C14A, and pDEST17Mjd:jos:C14A) were obtained by recombination of the corresponding pDONR207 plasmids with the pDEST17 vector using the Gateway Cloning System (Invitrogen). Glutathione-S-transferase (GST)-tag mATX3 (GST::mATX3) expression plasmid (pDEST15Mjd) was obtained by recombination of the pDONR207Mjd with the pDEST15 vector using the Gateway Cloning System (Invitrogen). The pGEX-5X-1 vector (GE Healthcare) was used for the expression of recombinant GST. The pEGFP:Mjd plasmid was generated by subcloning a *BamHI*-digested PCR product into the *BamHI* restriction site of the pEGFP-C1 vector (Clontech). This PCR product was obtained by introducing the *BamHI* restriction sites, in frame at both 5' and 3' of the *Mjd* cDNA coding region, using the pair of primers 5'MjdBamHI/3'MjdBamHI (Supplemental Table 2), the pDONR207Mjd plasmid as template, and the Expand High Fidelity System (Roche) under the

conditions: 5min at 95°C, followed by 35 cycles of 1min at 95°C, 1min at 55°C, 1min at 72°C, and ending with 5min at 72°C. All constructs were confirmed by automated sequencing.

### **Expression and purification of recombinant His-tagged proteins**

The recombinant hexahistidine-tagged mATX3, mATX3:C14A, mATX3:jos, mATX3:jos:C14A, and mATX3:UIMs proteins were expressed in *Escherichia coli* BL21SI cells (Invitrogen) and purified using the HiTrap Kit (GE Healthcare) as previously described for the human enzyme (Gales et al., 2005). The fractions of the proteins mATX3, mATX3:C14A, mATX3:jos, and mATX3:jos:C14A, considered appropriate for further purification, were selected by SDS-PAGE analysis, applied to a HiPrep 26/60 Sephacryl S-200 column (GE Healthcare) equilibrated in buffer A (20mM HEPES (pH7.5), 50 mM NaCl, 5% glycerol, 1mM EDTA, 1mM DTT), and protein was eluted with a flow rate of 0,5mL/min, at 4°C, being monitored at 280nm. After SDS-PAGE and analytical gel filtration analysis (Superdex 200) analysis, the fractions containing only protein monomers were pooled and concentrated in on Millipore Amicon Ultra-15 concentrators (cut-off 10KDa, Millipore) to 1-2mg/mL. Purified monomeric proteins were diluted into a 20µM working solution and maintained in ice for enzymatic assays and then stored at -80°C.

### **GST::mATX3 expression and purification**

The recombinant GST::mATX3 protein was expressed in *Escherichia coli* BL21SI cells (Invitrogen Life Technologies) as above mentioned. Cells were harvested, resuspended in PBS, 200µg/mL lysozyme, 1% Triton X-100, 1mM phenylmethylsulphonyl fluoride (PMSF), protease inhibitors (Complete, Roche), and stored at -20°C. After defrosting, the cell suspension was incubated with agitation at 4°C, during 1h, sonicated, and after centrifugation the supernatant was collected. The soluble recombinant proteins were purified using

glutathione-sepharose<sup>TM</sup> 4B beads (GE Healthcare) according to manufacturer's instructions, being eluted in three fractions of 10 mM reduced glutathione in 50mM Tris-Cl pH8.0. The eluted fractions considered appropriate were dialyzed using a dialysis membrane with a cut-off of 14KDa (Medicell) placed in PBS, overnight, at 4°C. Protease inhibitors (Complete, Roche Diagnostics) and PMSF were added to the dialyzed protein that was using the Bradford reagent (Sigma Aldrich).

### **De-ubiquitination (DUB) assay**

K48 and K63- linked multiubiquitin chains (Biomol, International LP) (1µg) were incubated with purified His-tagged mATX3, mATX3:C14A, mATX3:jos, mATX3:jos:C14A, and mATX3:UIMs proteins (2.5µM) in a final volume of 20µL of DUB assay buffer (50mM HEPES (pH7.4), 500mM EDTA, 1mM DTT, 0.1mg/mL BSA, COMPLETE (Roche Diagnostics), during 15 h at 30°C. Reactions were stopped by addition of Laemmli sample buffer containing 100mM DTT.
