# Supplementary material for: Ataxin-3 Plays a Role in Mouse Myogenic Differentiation through Regulation of Integrin Subunit Levels
Source: PubMed Central journal article supplement (PMC2909204; doi:10.1371/journal.pone.0011728), 2010-07-23
Supplement: pone.0011728.s004.pdf [file pone.0011728.s004.pdf]

**Table S1.** Proteins showing altered levels upon *Mjd* siRNA in undifferentiated C2C12 cells (Day 0). Cut-off (sketched line): proteins with fold changes  $\geq 20\%$  ( $1.2 < \text{ratio} < 0.8$ ) considering a statistical significant p-value  $< 0.05$ . Functional networks: (A) cellular movement; (B) drug metabolism; (C) protein synthesis; (D) skeletal and muscular system development and function, tissue morphology; (E) cellular development, embryonic development, cellular assembly and organization; (F) small molecule biochemistry, gene expression.

| Accession number | Description                                                         | Fold change Mjd siRNA/ mock | Functional network |
|------------------|---------------------------------------------------------------------|-----------------------------|--------------------|
| gi 6680229       | high mobility group box 2                                           | 3.076                       | D                  |
| gi 31981035      | dynein light chain LC8-type 1                                       | 2.611                       | D                  |
| gi 31981327      | proteasome (prosome, macropain) subunit, beta type 2                | 2.259                       | D                  |
| gi 84042521      | barrier to autointegration factor 1                                 | 2.233                       | D                  |
| gi 13542867      | non-metastatic cells 1, protein (NM23A)                             | 1.775                       | A , E              |
| gi 114326546     | phosphoglycerate mutase 1                                           | 1.774                       | A                  |
| gi 37700232      | nucleoside-diphosphate kinase 1                                     | 1.736                       | -                  |
| gi 84875544      | LIM domain binding 3 isoform c                                      | 1.574                       | B                  |
| gi 21886811      | S100 calcium binding protein A11 (calizzarin)                       | 1.559                       | F                  |
| gi 50263046      | glutathione S-transferase, alpha 2 (Yc2)                            | 1.540                       | B                  |
| gi 61098065      | glutathione S-transferase, alpha 1 (Ya)                             | 1.475                       | -                  |
| gi 125656173     | acetyl-Coenzyme A carboxylase alpha                                 | 1.470                       | A                  |
| gi 33859580      | galectin 3                                                          | 1.463                       | A                  |
| gi 115385968     | transportin 1 isoform 1                                             | 1.443                       | B                  |
| gi 6681079       | cathepsin B preproprotein                                           | 1.440                       | C , F              |
| gi 31982030      | Rho GDP dissociation inhibitor (GDI) alpha                          | 1.401                       | A                  |
| gi 96975138      | hypoxanthine guanine phosphoribosyl transferase 1                   | 1.399                       | C                  |
| gi 56605979      | basic transcription factor 3                                        | 1.391                       | B                  |
| gi 83921595      | diazepam binding inhibitor isoform 1                                | 1.387                       | A                  |
| gi 9790141       | actin related protein 2/3 complex, subunit 3                        | 1.362                       | A                  |
| gi 6677833       | S100 calcium binding protein A10                                    | 1.360                       | C                  |
| gi 61743961      | AHNAK nucleoprotein isoform 1                                       | 1.338                       | E                  |
| gi 83921612      | thioredoxin domain containing 5                                     | 1.337                       | E                  |
| gi 13384778      | 6-phosphogluconolactonase                                           | 1.336                       | -                  |
| gi 94378322      | PREDICTED: similar to ribosomal protein L38                         | 1.331                       | C                  |
| gi 6680840       | calumenin isoform 1                                                 | 1.316                       | F                  |
| gi 6679439       | peptidylprolyl isomerase A                                          | 1.304                       | B , C              |
| gi 10092608      | glutathione S-transferase, pi 1                                     | 1.303                       | B                  |
| gi 149270774     | PREDICTED: similar to Myoferlin (Fer-1-like protein 3) isoform 2    | 1.302                       | D                  |
| gi 6753364       | cell division cycle 42 homolog                                      | 1.302                       | A                  |
| gi 6754082       | glutathione S-transferase, alpha 4                                  | 1.297                       | B                  |
| gi 6997239       | poly(rC) binding protein 2                                          | 1.297                       | -                  |
| gi 116517336     | four and a half LIM domains 1 isoform 2                             | 1.287                       | B                  |
| gi 6681219       | dihydropyrimidinase-like 3                                          | 1.284                       | F                  |
| gi 19527026      | leucine rich repeat containing 59                                   | 1.272                       | -                  |
| gi 12963737      | chromosome segregation 1-like                                       | 1.264                       | D                  |
| gi 21313144      | GTP-binding protein PTD004 isoform a                                | 1.262                       | -                  |
| gi 31559990      | torsin family 1, member B                                           | 1.252                       | -                  |
| gi 6755152       | prolyl endopeptidase                                                | 1.247                       | C                  |
| gi 22094111      | solute carrier family 2 (facilitated glucose transporter), member 1 | 1.246                       | A                  |
| gi 6681069       | cysteine and glycine-rich protein 1                                 | 1.234                       | E                  |
| gi 31982186      | malate dehydrogenase 2, NAD (mitochondrial)                         | 1.225                       | A                  |
| gi 6754696       | macrophage migration inhibitory factor                              | 1.223                       | A , F              |
| gi 31981302      | annexin A6                                                          | 1.221                       | F                  |
| gi 126012517     | small inducible cytokine subfamily E, member 1                      | 1.220                       | A                  |
| gi 6755392       | S100 calcium binding protein A6 (calcyclin)                         | 1.219                       | C                  |
| gi 93102409      | fatty acid synthase                                                 | 1.219                       | B                  |
| gi 6754256       | heat shock protein 9                                                | 1.218                       | -                  |

|              |                                                                                   |        |   |
|--------------|-----------------------------------------------------------------------------------|--------|---|
| gi 113680348 | fascin homolog 1, actin bundling protein                                          | 1.213  | A |
| gi 6677777   | ribosomal protein L26                                                             | 1.206  | C |
| gi 7106303   | EH-domain containing 1                                                            | 1.201  | E |
| gi 6753320   | chaperonin subunit 3 (gamma)                                                      | -1.251 | B |
| gi 21281687  | deoxyuridine triphosphatase                                                       | -1.254 | F |
| gi 126723461 | chaperonin subunit 8 (theta)                                                      | -1.261 | B |
| gi 94377390  | PREDICTED: similar to insulinoma protein (rig)                                    | -1.261 | - |
| gi 31982755  | vimentin                                                                          | -1.263 | A |
| gi 6678419   | tripeptidyl peptidase II                                                          | -1.265 | C |
| gi 82965849  | PREDICTED: hypothetical protein                                                   | -1.266 | E |
| gi 116089273 | guanosine diphosphate (GDP) dissociation inhibitor 2                              | -1.272 | D |
| gi 21312298  | serine hydroxymethyltransferase 2 (mitochondrial)                                 | -1.276 | C |
| gi 22165392  | non-SMC condensin I complex, subunit D2                                           | -1.276 | B |
| gi 13385408  | ribosomal protein L11                                                             | -1.280 | E |
| gi 31981679  | heat shock protein 1 (chaperonin)                                                 | -1.281 | A |
| gi 27883844  | small nuclear ribonucleoprotein E                                                 | -1.284 | D |
| gi 15426055  | coatamer protein complex, subunit beta 1                                          | -1.289 | E |
| gi 149269890 | PREDICTED: similar to ribosomal protein L11                                       | -1.289 | E |
| gi 41322931  | plectin 1 isoform 6                                                               | -1.300 | A |
| gi 112363072 | actin related protein 2/3 complex, subunit 2                                      | -1.303 | A |
| gi 93102415  | phosphoribosylglycinamide formyltransferase                                       | -1.310 | C |
| gi 149234051 | PREDICTED: similar to ribosomal protein L10a                                      | -1.313 | - |
| gi 149254252 | PREDICTED: similar to vesicle associated protein                                  | -1.319 | B |
| gi 6755364   | RNA polymerase II transcriptional coactivator                                     | -1.328 | B |
| gi 33468885  | calcyclin binding protein                                                         | -1.330 | A |
| gi 33859482  | eukaryotic translation elongation factor 2                                        | -1.330 | A |
| gi 47271396  | GNAS complex locus isoform a                                                      | -1.341 | B |
| gi 6680047   | guanine nucleotide binding protein (G protein), beta polypeptide 2 like 1         | -1.346 | B |
| gi 27229277  | threonyl-tRNA synthetase                                                          | -1.346 | - |
| gi 149262992 | PREDICTED: similar to Protein disulfide isomerase associated 6                    | -1.390 | - |
| gi 56699434  | eukaryotic translation initiation factor 4, gamma 1 isoform b                     | -1.393 | A |
| gi 38348472  | adaptor-related protein complex 2, sigma 1 subunit                                | -1.406 | C |
| gi 6677813   | ribosomal protein S8                                                              | -1.424 | E |
| gi 58037465  | Ribosomal protein L18A                                                            | -1.428 | E |
| gi 31981534  | proteasome (prosome, macropain) subunit, alpha type 3                             | -1.437 | D |
| gi 6753620   | DEAD/H (Asp-Glu-Ala-Asp/His) box polypeptide 3, X-linked                          | -1.447 | B |
| gi 88853578  | adaptor protein complex AP-1, beta 1 subunit                                      | -1.470 | D |
| gi 94395563  | PREDICTED: hypothetical protein isoform 2                                         | -1.482 | - |
| gi 6753882   | FK506 binding protein 4                                                           | -1.506 | B |
| gi 78190507  | exportin 1, CRM1 homolog                                                          | -1.517 | F |
| gi 25742730  | ribosomal protein L32                                                             | -1.520 | C |
| gi 10242373  | minichromosome maintenance complex component 7                                    | -1.527 | D |
| gi 6755198   | proteasome (prosome, macropain) subunit, alpha type 6                             | -1.545 | D |
| gi 6754616   | mago-nashi homolog, proliferation-associated                                      | -1.551 | C |
| gi 31982143  | WW domain binding protein 11                                                      | -1.554 | - |
| gi 82953132  | PREDICTED: hypothetical protein                                                   | -1.605 | - |
| gi 8393150   | carboxyl terminal LIM domain protein 1                                            | -1.607 | B |
| gi 6755698   | surfeit gene 4                                                                    | -1.612 | E |
| gi 22122515  | AHA1, activator of heat shock 90kDa protein ATPase homolog 1                      | -1.621 | C |
| gi 34328185  | prosaposin                                                                        | -1.629 | D |
| gi 6755206   | proteasome (prosome, macropain) subunit, beta type 7                              | -2.225 | D |
| gi 94378251  | PREDICTED: similar to histone H4                                                  | -2.282 | - |
| gi 84619697  | sterol O-acyltransferase 1                                                        | -2.555 | F |
| gi 149269808 | PREDICTED: similar to Eukaryotic translation initiation factor 3, subunit 1 alpha | -2.557 | - |
| gi 149272386 | PREDICTED: similar to thymosin beta-4                                             | -2.630 | - |
