# Supplementary material for: Ataxin-3 Plays a Role in Mouse Myogenic Differentiation through Regulation of Integrin Subunit Levels
Source: PubMed Central journal article supplement (PMC2909204; doi:10.1371/journal.pone.0011728), 2010-07-23
Supplement: pone.0011728.s005.pdf [file pone.0011728.s005.pdf]

**Table S2.** Primers used in this study.

| <b>Name</b>          | <b>Sequence 5'→3'</b>                                | <b>Orientation</b> |
|----------------------|------------------------------------------------------|--------------------|
| <b>attB1Mjd</b>      | GGGGACAAGTTTGTACAAAAAAGCAGGCTGGATGGAGTCCATCTTCCACGAG | forward            |
| <b>attB2Mjd</b>      | GGGGACCACTTTGTACAAGAAAGCTGGGTCTTACTTCTTTCGCTCTGCTT   | reverse            |
| <b>attB1Mjd:UIMs</b> | GGGGACAAGTTTGTACAAAAAAGCAGGCTATATGGCTGATGGGTCTGGGCA  | forward            |
| <b>attB2Mjd:Jos</b>  | GGGGACCACTTTGTACAAGAAAGCTGGGTCTTATGCTTCTAAGACGCGCT   | reverse            |
| <b>5'MjdBamHI</b>    | GCCTGGATCCATGGAGTCCATCTTCCACGAG                      | forward            |
| <b>3'MjdBamHI</b>    | GCCTGGATCCTTACTTCTTTCGCTCTGCTTT                      | reverse            |
| <b>Mjd-mutC14A</b>   | GAAACAAAAAGGCTCACTTGCTGCTCAGCATTGCCTGAA              | forward            |
| <b>Hprt(3)</b>       | GCTGGTAAAAGGACCTCT                                   | forward            |
| <b>Hprt(4)</b>       | CACAGGACTAGAACACCTGC                                 | reverse            |
| <b>Itga5(1)</b>      | GGACGGAGTCAGTGTGCTG                                  | forward            |
| <b>Itga5(2)</b>      | GAATCCGGGAGCCTTTGCTG                                 | reverse            |
| <b>Itga7(1)</b>      | GAGCTGGCTGCTGGTGGGCG                                 | forward            |
| <b>Itga7(2)</b>      | CTCCTTCTGCACGTTAGCTC                                 | reverse            |
| <b>Josd1(1)</b>      | AAGATGCCAGAGTGGATTGG                                 | forward            |
| <b>Josd1(2)</b>      | TGATGGGCTTCCACTTCTTC                                 | reverse            |
| <b>Josd2(1)</b>      | CGGCAACTATGATGTCAACG                                 | forward            |
| <b>Josd2(2)</b>      | AGCGACACAGGAGAGGGTAG                                 | reverse            |
